# Supplementary material for: Source apportionment of atmospheric aerosol in a marine dusty environment by ionic/composition mass balance (IMB)
Source: Copernicus journal article supplement (doi:10.5194/acp-18-13215-2018), 2018-09-13
Supplement: Supplementary file 1 [file CVDUST dataset.xlsx]

## Sheet: PM10
Start	End	TotalMass	EC	OC	CO32-	Cl-	NO3-	SO42-	Na+	NH4+	K+	Mg2+	Ca2+	Al	As	Ba	Br	Ca	Cl	Co	Ce	Cr	Cu	Fe	K	Mg	Mn	Na	Ni	S	Sb	Sc	Si	Sm	Ti	V	Pb	Zn	Zr
(d/m/y h:m)	(d/m/y h:m)	(µg.m-3)	(µg.m-3)	(µg.m-3)	(µg.m-3)	(µg.m-3)	(µg.m-3)	(µg.m-3)	(µg.m-3)	(µg.m-3)	(µg.m-3)	(µg.m-3)	(µg.m-3)	(ng.m-3)	(ng.m-3)	(ng.m-3)	(ng.m-3)	(ng.m-3)	(ng.m-3)	(ng.m-3)	(ng.m-3)	(ng.m-3)	(ng.m-3)	(ng.m-3)	(ng.m-3)	(ng.m-3)	(ng.m-3)	(ng.m-3)	(ng.m-3)	(ng.m-3)	(ng.m-3)	(ng.m-3)	(ng.m-3)	(ng.m-3)	(ng.m-3)	(ng.m-3)	(ng.m-3)	(ng.m-3)	(ng.m-3)
2011-01-09 12:00:00	2011-01-12 12:00:00	129.316	0.0793527	0.544161	0.940132	6.27492	1.04598	1.72124	4.62913	0.0513274	0.266073	0.422403	1.04932	6460.87	0.78508	43.9502	10.7995	1972.67	4939.73	1.3895	8.4138	5.97334	10.4142	4998.6	1961.86	798.307	91.2879	4971.66	2.85252	508.613	0.0883232	1.3371	12192.7	1.1967	486.391	0.7	5.21728	18.6457	14.0192
2011-01-12 12:25:00	2011-01-14 12:25:00	131.723	0.0977212	0.630406	1.88806	3.60525	1.0755	1.62489	2.36849	0.0823249	0.248878	0.325481	1.19019	7084.15	0.877311	59.6766	9.29716	2577.09	3628.93	2.04774	12.325	7.68636	4.50987	5178.5	2163.52	1017.52	83.4787	3802.01	7.26467	556.981	0.113703	1.63088	13973	1.1482	500.717	0.85	4.21978	16.0411	19.3437
2011-01-14 12:45:00	2011-01-18 09:00:00	49.0794	0.135312	1.09199	1.80773	1.34592	0.441821	0.615693	0.846464	0.0196503	0.0966715	0.141968	0.487305	3348.75	0.444717	32.1509	5.31206	1014.53	1252.29	0.92	4.41045	2.74975	1.79953	2124.29	863.661	476.552	34.0147	994.264	1.68658	251.253	0.0995837	0	6427.58	0.46	210.451	2.89431	2.4423	8.78894	8.55899
2011-01-18 13:45:00	2011-01-19 16:00:00	171.542	0	0.541	0.713194	4.33199	1.6055	1.44191	2.88634	0.121369	0.279943	0.289388	0.895722	12264.2	1.6797	96.0365	8.70701	2420.98	4364.33	2.91412	16.5186	9.75978	5.10709	7586.13	2292.09	1291.93	119.049	3304.42	5.8248	573.902	0.06	2.27945	21488.4	1.60511	781.662	37.3985	3.77328	16.5791	23.9713
2011-01-24 12:50:00	2011-01-26 12:40:00	10.197	0.164269	0.418784	0.320521	1.01682	0.237256	0.385766	0.8159	0.0909382	0.0579356	0.0731109	0.0731077	198.417	1.04975	18.2384	2.84066	172.572	1896.03	0.446979	1.48366	0.004	1.10137	171.492	206.503	325.05	3.97889	634.864	0.393642	300.635	0.148148	0.397593	480.429	0.160625	29.5079	0.904001	0.852831	11.2848	0
2011-01-26 13:20:00	2011-01-29 13:20:00	17.1629	0.272493	0.495574	0.0630511	2.22988	0.536199	1.1548	2.03749	0.158105	0.0927006	0.205129	0.121126	261.23	0.302723	26.253	2.32605	190.648	2197.43	0.232388	0.801167	0.004	1.10568	193.615	200.59	297.945	4.49181	1891.38	0.478516	435.189	0.135291	0.132698	423.471	0.0886868	31.2891	0.931688	0.967429	19.9419	0
2011-01-31 13:25:00	2011-02-02 13:25:00	28.1681	0.108619	0.359317	0.767463	3.16785	0.429016	0.768998	2.26441	0.0499409	0.104614	0.20502	0.47091	807.212	0.135405	13.4368	6.87941	866.968	3522.51	0.76	2	0.004	0.645937	571.232	309.546	351.519	10.1582	2278.95	0.469202	363.44	0.03	0.157631	1865.58	0.113658	62.1147	0.658193	0.27	17.9304	1.97346
2011-02-02 13:40:00	2011-02-03 13:40:00	83.947	0.235901	0.646512	3.16322	7.54268	1.0915	1.99073	5.38435	0.064053	0.298972	0.512318	2.01445	3718.02	0.562259	13.8989	18.7804	3183.44	7011.18		3.5	6.0591	0.35	2285.85	1153.23	1067.52	54.6574	4601.61	0.002	770.569	0.06	0.805887	7850.32	0.429009	207.79	0.85	0.9	8.9344	6.59711
2011-02-03 14:00:00	2011-02-04 14:00:00	389.948	0.0148387	5.11641	13.3954	10.3119	1.30066	4.29818	8.25438	0.175878	0.628871	0.929221	6.68085	33984.3	3.49026	198.803	28.1858	12478.4	9890.6		32.1722	21.3273	4.01349	16693.1	6637.76	7119.99	320.097	7653.02	6.16508	2012.32	0.15	4.94648	60968.2	3.03188	1557.71			57.7232	50.2745
2011-02-04 14:00:00	2011-02-05 09:28:00	385.121	0	2.26418	9.93835	8.92941	1.46177	3.73596	6.29482	0.116036	0.520243	0.599802	4.13277	54005.3	3.21383	203.002	28.7018	11405.2	10879.8	7.85838	35.8654	27.1958	10.6681	17086.8	6984.72	11632.8	310.498	6676.83	8.59632	2004.15	0.207081	5.48964	89067	3.32865	1692.76	2.3	18.8783	46.5829	56.9349
2011-02-05 19:10:00	2011-02-06 08:10:00	270.446	0	2.14704	4.45439	7.58903	1.63006	2.7123	5.98382	0.268633	0.605753	0.634368	3.41973	33618	3.03293	193.789	16.9174	6295	7773.83	5.03776	23.0384	17.1064	6.86069	12118.8	5036.99	7157.38	215.538	5590.1	5.47443	1417.97		3.64871	56429.7	2.70632	1260.42		4.2	62.9238	47.0406
2011-02-06 12:00:00	2011-02-07 08:10:00	293.97	0	1.51977	9.16969	7.60566	1.67355	3.69762	5.36308	0.0869117	0.544342	0.644164	4.90122	52047.9	3.47485	206.989	22.173	10893.8	9469.08	5.49727	24.5887	16.1911	4.05224	13933.6	6146.78	11529.5	236.704	6264.65	9.5138	2325.76		4.21402	77070.5	2.71966	1315.9	18.3468	3.9	42.8516	40.9667
2011-02-07 09:25:00	2011-02-08 08:25:00	209.61	0	1.18375	4.81754	5.93974	1.88417	3.07174	4.44748	0.0642609	0.384609	0.456087	2.9373	32711.2	2.8426	118.708	15.2159	6699.17	6765.49	4.1188	19.5285	12.4952	3.33816	9890.11	4411.74	7120.18	158.609	4811.75	5.42711	1928.46	0.14	3.26814	49771.1	1.8725	933.368	11.4605	11.16	22.4601	29.4228
2011-02-09 08:30:00	2011-02-11 08:00:00	54.1051	0.107734	0.551202	0.652349	4.00483	1.07109	1.32971	2.70496	0.0807563	0.127395	0.27	0.722437	3318.01	0.516008	38.8456	10.1554	1313.33	3479.64	0.867151	3.3347	3.14421	2.39469	1768.05	804.546	665.284	27.8901	2919.49	2.50758	669.716	0.128999	0.615122	5903.6	0.353064	175.296	0.55	3.8481	10.3698	0
2011-02-11 08:20:00	2011-02-13 08:20:00	43.8435	0.0149692	0.35115	0.114229	6.50857	0.796674	1.40865	4.76507	0.161497	0.202412	0.434428	0.500166	1985.49	0.196306	15.0096	10.3436	771.807	6098.6	0.383248	1.5092	0.00756801	0.545727	867.681	437.759	726.806	19.7025	3929.97	0.002	655.316	0.09	0	3156.04	0.164434	97.9872	0.43	0.5	14.6642	3.30316
2011-02-13 12:45:00	2011-02-15 12:45:00	47.7191	0.0595233	0.424475	0.304734	6.60468	0.877072	1.29374	5.56351	0.154279	0.20455	0.485135	0.464279	2468.1		28.218	19.7646	986.621	9590.73	0.295581	1.17805	0.747664	0.84708	739.111	521.278	1541.89	14.0998	4900.94	0.302593	1035.56	0.15	0.196244	3839.34	0.128983	74.4567	0.43	0.7	29.7505	4.4722
2011-02-15 13:00:00	2011-02-17 13:00:00	41.8518	0.133931	0.555272	0.0453442	7.32445	1.08936	1.71002	5.47755	0.212183	0.18815	0.486071	0.289854	549.777		7.1007	8.44472	346.848	6316.26	0.187513	0.560165	0.004	1.24985	279.138	402.296	243.941	5.60314	4403	0.522413	728.072	0.018	0.0907608	878.884	0.0560896	38.5594	0.33	0.33	12.4186	1.70934
2011-02-17 13:20:00	2011-02-19 13:20:00	34.2266	0.165308	0.609561	0.0945307	5.98108	1.00719	1.37942	4.50154	0.148649	0.159875	0.408274	0.282827	1293.39		14.7085	9.50335	519.221	7149.74	0.174165	0.61695	0.0153185	0.598804	385.305	230.487	781.241	6.07644	3582.37	0.571812	802.779	0.018	0.101054	1897.92	0.057778	42.0243	3.91451	0.5	22.8427	0
2011-02-19 13:35:00	2011-02-21 13:35:00	57.5993	0.13641	0.734932	0.291277	5.23746	0.757256	1.03792	3.71726	0.101538	0.120416	0.338628	0.310728	1400.67	0.131343	81.3989	11.9213	997.145	14764.3	0.301131	1.28286	0.431174	1.67089	673.838	554.387	1755.06	13.0319	5194.23	1.08795	1130.67	0.0405839	0	3643.2	0.134221	80.4298	0.55	0.6	61.479	4.63475
2011-02-21 13:50:00	2011-02-23 13:50:00	66.9543	0.195559	1.00732	1.40289	7.32811	1.26071	2.0674	5.36694	0.155967	0.232931	0.502536	1.42715	3712.4	0.395382	36.7087	11.6682	2078.37	6609.86	0.855961	3.30045	2.02655	2.14134	1664.02	946.222	1093.51	29.3003	4387.61	1.21352	926.521	0.0908605	0	6452.73	0.308494	178.948	0.6	2.08819	25.4338	7.30852
2011-02-23 14:10:00	2011-02-24 14:10:00	115.927	0.319206	1.60257	1.40977	9.07918	2.14749	2.79677	6.80256	0.307938	0.322602	0.663367	1.84488	7325.31	0.736602	59.366	14.135	2535.38	7539.03	1.25845	5.71254	3.41387	0.918984	2899.58	1452.44	1630.49	51.1164	5409.34	1.76245	1254.16	0.254227	0.966431	12293	0.595506	294.396	1	9.2175	35.0622	10.988
2011-02-24 14:30:00	2011-02-27 17:50:00	139.215	0.448	1.895	3.81282	8.26696	1.7514	3.01926	6.27463	0.198373	0.345264	0.607242	2.50622	15557	0.978328	111.611	14.6358	4305.38	6655.46	2.22504	9.82474	6.51339	8.87569	4624.32	2137.64	4052.86	72.6012	4795.93	7.9169	1474.78	0.248128	1.51658	24687.7	0.858794	470.383	1.1	10.9056	27.4469	20.2258
2011-02-27 18:15:00	2011-02-28 08:15:00	352.226	0	2.96234	10.5796	8.306	1.37014	4.05929	6.35086	0.0517143	0.489286	0.563429	5.455	52908.1	3.3424	264.161	22.9199	12079.5	9947.59	7.10919	32.8968	25.2674	22.6844	16875.9	6734.68	12144.6	304.458	6418.36	9.04954	2347.06	0.15	5.7562	82313.9	2.66916	1498.37		17.2436	49.7105	40.8775
2011-02-28 18:50:00	2011-03-01 14:00:00	142.829	0.29492	1.8294	3.69403	5.67232	1.32947	2.12884	4.27421	0.0829474	0.232526	0.424316	2.62063	14009.8	1.08119	90.8329	12.189	4374.77	5742.68	2.1478	10.8934	6.69024	1.59133	5216.1	2428.31	3190.35	87.3614	4201.54	1.71694	1064.24	0.15	0	23484.1	1.04957	492.653	4.12737	1.9	20.5896	28.3625
2011-03-01 14:30:00	2011-03-03 14:35:00	59.6389	0.198401	1.15026	0.60607	8.0798	1.66169	2.12959	6.22317	0.145366	0.236947	0.593282	0.962713	3741.86	0.338652	116.629	13.1845	1667.1	11122.1	0.470223	1.97343	1.53614	7.51416	985.779	603.89	2431.38	17.6159	5183.48	1.25969	1258.67	0.22479	0.299319	5861.5	0.18069	109.903	0.55	0.9	88.8559	6.5095
2011-03-03 14:50:00	2011-03-06 15:00:00	38.6082	0.272733	0.84949	0.256449	6.09356	1.50306	1.70688	4.62525	0.298385	0.219294	0.436196	0.655491	1294.07		0	7.49972	864.469	5532.23	0.280244	0.44	0.00471251	0.35807	540.834	376.271	737.589	11.9997	3925.03	0.002	781.416	0.137249	0	2151.02	0.15	68.0552	0.45	1.46567	13.0096	0
2011-03-08 08:10:00	2011-03-11 18:15:00	22.7904	0.112182	0.516955	0.086875	3.76822	0.636967	0.950259	2.89772	0.17692	0.115309	0.263759	0.190813	796.312		0	4.42666	294.311	3996.55	0.84125	1.4	0.004	0.217847	279.235	22.354	640.075	6.09626	396.097	0.224211	498.188	0.002	0.194654	1102.08	0.13	49.6934	0.27	0.32	13.4199	0
2011-03-13 11:45:00	2011-03-16 12:10:00	30.297	0.12388	0.430933	0.0564583	4.64624	0.452942	0.974327	3.52549	0.0773868	0.13278	0.327974	0.201987	486.975	0.112512	12.2508	5.91957	297.231	4264.99	0.207594	0.465554	0.242053	0.946028	310.975	215.616	317.333	6.08838	3201.52	0.713077	421.085	0.089101	0	733.478	0.0708452	50.4712	0.24	0.35	11.5119	2.57273
2011-03-16 13:00:00	2011-03-18 13:00:00	52.5066	0.142294	0.652194	0.370052	9.3778	1.25005	1.88753	6.46124	0.171454	0.230048	0.605584	0.697187	1678.41		23.8923	13.7418	987.225	7512.77	0.32579	1.01216	0.498897	0.960222	729.199	382.471	860.671	12.0697	4910.94	1.51131	783.716	0.364416	0	2922.98	0.12652	78.6139	0.39	1.17855	20.0031	2.67314
2011-03-18 13:10:00	2011-03-21 13:18:00	35.0539	0.122243	0.689455	0.108966	8.67854	0.890628	1.78188	5.62184	0.149679	0.266636	0.527527	0.513579	1645.53		28.4148	7.55995	965.108	5225.7	0.459649	0.44	1.48226	1.37701	911.767	546	718.975	16.9715	3444.22	2.4675	703.31	0.15	0	2843	0.36	128.306	1.31519	1.08145	27.5986	5.03669
2011-03-21 14:00:00	2011-03-23 14:00:00	30.4214	0.155157	0.855341	0.0746074	5.96835	0.822012	1.53744	4.30825	0.285261	0.184655	0.386352	0.349949	830.114		10.7986	9.16472	587.095	5209.96	0.467506	0.44	0.576505	1.2237	592.171	267.533	486.056	12.8665	3635.98	1.92381	666.463	0.15	0.160534	1340.58	0.12	99.8719	1.8939	1.82515	16.3395	3.03225
2011-03-23 14:30:00	2011-03-28 08:30:00	84.2306	0.141454	0.823029	1.67336	8.66589	1.68936	3.68961	7.21888	0.280794	0.348741	0.654361	1.83701	4837.72	0.705004	36.0683	11.8048	3510.06	4538.75	1.04453	4.15652	3.96375	3.94787	2588.88	1178.47	1218.24	40.0296	4744.06	4.27772	1609.59	0.150028	0.741978	8674.62	0.461035	278.925	5.17423	7.94542	29.9822	11.9385
2011-03-28 09:00:00	2011-03-30 13:10:00	78.6195	0.208562	1.26854	1.7233	10.033	1.69655	2.84612	7.20001	0.421831	0.330273	0.682107	1.90954	4409.59	0.363105	27.122	10.4453	2980.61	8125.04	0.077	0.09	3.59627	4.10354	2292.91	842.316	1609.2	42.662	5535.98	4.79236	1541.46	0.17	0	7723.3	0.404591	310.886	5.41232	7.33321	10.4874	12.1254
2011-03-30 13:30:00	2011-04-02 09:35:00	53.9005	0.176816	0.602869	0.169998	10.6003	1.2271	2.78418	7.33486	0.365201	0.295075	0.646422	0.793103	1594.21	0.394079	18.0612	9.97678	1636.94	7036.26	0.878545	0.075	1.66254	2.87081	1261.93	520.242	687.559	27.9486	5337.17	3.66882	1132.37	0.111912	0	3124.46	0.246958	191.054	3.45575	2.70149	21.4997	5.0592
2011-04-02 17:20:00	2011-04-05 13:22:00	60.2452	0.155876	0.78791	0.992967	7.97084	0.897796	2.16531	5.81463	0.245474	0.252531	0.549143	0.957796	1678.55	0.372533	22.668	12.1507	1620.25	7173.95	0.024	0.16	1.41703	4.1998	1091.61	708.953	569.435	18.2832	5819.85	2.00157	1074.85	0.557568	0	3494.82	0.220287	127.328	0.36	2.38205	27.2277	3.9433
2011-04-05 14:15:00	2011-04-08 08:00:00	57.4231	0.149636	0.757836	0.904879	7.57073	1.43534	2.04064	5.60143	0.227712	0.229442	0.471825	1.16419	1908.2		24.5055	10.0785	1784.1	6575.81	0.572102	0.44	1.42163	2.59193	1178.07	657.655	689.421	19.7926	4598.76	1.78205	991.19	0.188703	0.357596	4187.99	0.23223	120.374	0.37	0.5	17.0029	3.22366
2011-04-10 15:05:00	2011-04-12 13:00:00	94.0145	0.446451	1.32713	1.37537	8.06556	1.75657	2.71164	6.30013	0.236473	0.343515	0.611421	1.58105	3850.03	0.494232	32.9076	9.00957	2377.23	6771.94	1.40317	0.11	4.06952	4.9933	2627.29	1386.43	729.219	41.9423	6010.61	4.06339	1091.91	0.13	1.00464	7903.58	0.5833	283.654	4.52363	4.52054	11.9556	8.05849
2011-04-12 13:45:00	2011-04-14 13:57:00	54.8866	0.303606	1.09669	0.0459957	6.47864	1.86011	2.48344	4.67979	0.422827	0.245759	0.433691	0.543479	1753.09		17.9545	9.01963	866.928	5322.16	0.573838	0.08	1.09852	2.75346	1048.89	678.714	520.477	19.0652	4603.49	2.10931	1035.56	0.0933921	0.332548	3492.17	0.246467	126.165	3.37999	1.14345	26.5401	5.14257
2011-04-14 14:35:00	2011-04-16 14:35:00	29.0897	0.427615	0.631482	0.106063	3.14676	1.29854	1.60717	2.46733	0.26064	0.149589	0.231271	0.362289	1229.44		8.0446	4.33815	579.122	3187.27	0.308626	0.075	0.218039	6.10268	661.305	313.288	418.055	12.3733	2413.68	1.21839	776.699	0.15	0.191464	2245.45	0.136976	84.798	2.52943	1.1724	22.9807	4.49047
2011-04-16 15:30:00	2011-04-19 14:05:00	24.2485	0.181203	0.580399	0.0782168	2.85686	0.899438	1.24345	2.07845	0.229344	0.11222	0.193508	0.312319	1013.28	0.124545	9.87853	2.74797	491.731	2149.11	0.330969	1.3182	0.353172	2.77039	631.505	311.848	295.856	11.2416	1819.78	1.11426	510.401	0.181875	0	1887.56	0.11807	83.4521	2.49415	1.56295	20.3881	2.47214
2011-04-19 14:40:00	2011-04-22 14:45:00	23.0133	0.132164	0.433403	0.0958447	4.07897	0.541965	1.12065	3.03096	0.16465	0.14389	0.277558	0.221472	676.87		4.55534	5.7797	368.868	7814.2	0.45949	0.908897	0.203163	0.710656	384.276	236.69	992.462	9.54247	2738.05	0.860293	831.172	0.125442	0.143537	1013.32	0.0806628	64.4044	2.17881	1.295	20.0897	1.4885
2011-04-22 15:15:00	2011-04-25 08:00:00	29.3831	0.0929216	0.464902	0.080683	6.3256	0.71048	1.48815	4.66698	0.185525	0.190004	0.425686	0.23685	429.868	0.152012	17.2357	8.01346	358.615	6132.35	0.164881	0.668286	0.004	0.684975	249.656	367.442	373.576	4.65673	4124.11	0.642116	693.879	0.0623059	0.086259	664.164	0.0463933	37.7158	0.939569	1.52885	29.311	1.95718
2011-04-25 14:15:00	2011-04-27 14:15:00	26.6113	0.104941	0.586554	0.0551241	5.50992	1.06908	1.71645	4.12016	0.285741	0.184556	0.375425	0.251183	544.145	0.137756	16.6765	4.6094	293.682	3981.6	0.205661	0.44	0.265218	0.628178	274.439	296.139	377.558	5.40869	3261.12	0.435996	632.261	0.15	0	823.073	0.13	42.2237	0.22	0.664277	24.2491	2.18427
2011-04-27 14:35:00	2011-04-30 13:45:00	17.2053	0.106973	0.514774	0.0645098	1.25584	0.195969	0.459576	0.905439	0.102507	0.0478017	0.0795262	0.064201	435.108	0.120737	17.5096	3.32954	207.645	2481.92	0.195391	0.507558	0.180295	1.23162	254.845	165.857	250.732	5.22994	1744.69	0.510156	429.183	0.195036	0.0885774	586.838	0.0475529	40.3277	0.17	1.01591	11.6312	1.51443
2011-04-30 18:05:00	2011-05-03 18:09:00	14.0455	0.132466	0.356637	0.0367647	1.73359	0.510969	0.857372	1.36525	0.184756	0.0742826	0.127259	0.113828	430.854		6.03056	2.39679	182.991	1663.49	0.132214	0.428406	0.157355	1.10037	196.366	186.206	315.469	3.91211	1167.92	0.405515	449.057	0.0557898	0	564.595	0.035155	29.9511	0.510116	0.740887	11.1953	0.982005
2011-05-04 08:20:00	2011-05-07 08:20:00	27.4624	0.0905406	0.602258	0.0995794	4.74081	0.668638	1.33788	3.52864	0.186491	0.178174	0.323665	0.298199	922.629		20.7343	6.05365	524.097	4071.62	0.219655	0.05	0.953077	0.917469	667.281	285.282	520.746	14.5941	2838.85	1.83656	593.899	0.15	0.193579	1394.58	0.124185	114.469	1.92055	0.887084	12.0321	3.68249
2011-05-08 09:40:00	2011-05-11 09:40:00	20.0234	0.118983	0.4667	0.0304813	4.34634	0.778047	1.47207	3.40714	0.256759	0.155201	0.31465	0.199465	679.341	0.0811022	12.9057	4.20116	376.332	3942.73	0.234	0.05	0.185758	1.77399	314.002	175.404	655.142	8.30432	2239.14	1.27596	651.88	0.06	0.0891248	897.782	0.0538279	49.1133	0.17	1.45028	24.9783	1.3266
2011-05-11 15:15:00	2011-05-14 15:15:00	17.5087	0.0963763	0.418099	0.0103458	4.34469	0.821202	1.43897	3.1778	0.239314	0.135143	0.289255	0.16048	432.98		4.65613	4.5192	228.334	3898.16	0.122882	0.33299	0.004	0.482676	176.519	160.894	363.234	3.53621	2280.56	0.29978	625.538	0.100405	0.0609764	574.321	0.13	28.6449	0.17	1.02401	22.748	0
2011-05-14 15:45:00	2011-05-17 15:45:00	29.7489	0.151695	0.819613	0.0827352	5.18384	1.05378	1.83966	3.84793	0.247979	0.186619	0.367216	0.415196	1210.15		25.0612	5.50048	583.355	3679.18	0.399413	1.27902	0.562405	1.19428	648.129	366.165	556.214	11.748	2823.24	1.15002	709.791	0.124983	0	1939.75	0.142768	96.6208	4.08371	1.78548	28.947	3.20747
2011-05-17 16:00:00	2011-05-19 16:00:00	44.1278	0.125428	0.776275	0.133546	7.05934	1.09541	2.5822	5.12199	0.279806	0.247569	0.484131	0.605091	2031.31		19.2394	6.32786	869.352	5732.42	0.31	1.50517	1.52269	1.51287	1005.19	529.311	834.592	16.8999	4107.7	1.75694	1050.89	0.17	0.299554	3285.54	0.181212	143.849	3.96742	3.59962	17.6715	4.28384
2011-05-19 16:40:00	2011-05-21 16:40:00	43.7835	0.152962	0.637459	0.127522	7.71682	1.56534	2.80264	5.98707	0.341624	0.266968	0.563511	0.636827	2055.6	0.240529	20.1668	8.54545	897.006	7096.55	0.439904	1.56256	1.65981	1.10564	817.848	471.488	1242.15	14.9234	4185.04	1.99597	1209.29	0.0756583	0.215231	3127.24	0.140577	110.981	2.19488	2.15708	21.7883	2.96358
2011-05-22 12:50:00	2011-05-25 13:00:00	28.0973	0.123006	0.584133	0.0432887	4.16696	1.24385	2.03928	3.10889	0.2979	0.148064	0.28964	0.27138	776.67	0.225552	26.7148	4.74337	419.166	3185.47	0.355879	0.952675	0.855668	0.872121	531.185	259.912	280.592	9.58532	2276.96	0.978807	718.439	0.119297	0.185843	1408.27	0.109777	73.0577	2.63115	1.83873	39.9383	3.23228
2011-05-25 13:30:00	2011-05-28 13:35:00	32.6458	0.103083	0.624235	0.0373241	5.95511	1.05657	2.48154	4.80026	0.281368	0.208513	0.452493	0.325591	689.922	0.179394	23.2576	4.8689	485.191	4897.31	0.346044	1.01789	0.468303	1.16288	552.225	292.324	320.923	10.5336	3664.18	1.14162	814.182	0.168287	0	1173.91	0.107526	85.4287	2.62368	2.30316	50.9845	2.87022
2011-05-28 15:55:00	2011-05-31 13:55:00	32.4383	0.12597	0.748377	0.0470228	5.16234	1.03104	1.83735	4.06146	0.269764	0.152851	0.341854	0.252172	774.04	0.255837	21.8335	6.5828	490.64	4383.37	0.391911	1.03623	1.13301	3.18099	596.043	371.754	344.376	11.4007	4047.72	1.39767	698.388	0.300505	0.181572	1324.64	0.170978	92.3177	1.47086	2.4157	29.7704	2.58858
2011-06-01 14:30:00	2011-06-03 14:30:00	41.4243	0.331726	1.09089	0.0682699	6.45882	1.30487	1.92547	4.98097	0.180637	0.192584	0.449869	0.634048	1530.89	0.546113	43.7398	6.60057	1067.82	3230.62	0.268669	1.61052	9.95316	1.84803	464.917	522.31	448.304	15.7737	2461.1	2.58033	961.988	0.338018	0.453718	2851.89	0.278161	146.804	7.10341	1.79092	40.1098	5.65976
2011-06-03 15:10:00	2011-06-06 08:20:00	19.5677	0.0721851	0.528528	0.0360097	5.50278	0.765706	1.81962	3.51421	0.20236	0.139263	0.293809	0.16622	590.799	0.0922157	20.4583	4.01323	347.907	2688.55	0.181537	0.661148	3.71495	0.480439	279.363	161.096	294.864	5.18782	1884.44	0.467689	597.185	0.0324273	0.116078	948.379	0.0686754	50.0583	0.741231	0.78066	31.3405	2.74078
2011-06-06 08:50:00	2011-06-09 08:20:00	20.0314	0.193649	0.57767	0.029613	4.10564	1.64574	1.73424	3.37888	0.42837	0.129784	0.287661	0.172994	299.481	0.340923	23.7551	4.42815	206.492	1730.09	0.126825	0.536403	5.8466	0.895647	163.314	122.051	112.038	3.00226	2201.35	0.344861	426.799	0.169968	0.061012	484.221	0.0391629	34.753	1.98552	1.25945	27.7751	0
2011-06-09 08:50:00	2011-06-11 12:50:00	33.3294	0.277538	1.32356	0.0362794	5.69705	1.4907	2.02398	4.34185	0.273057	0.189561	0.377122	0.521978	1177.23		33.2142	4.56874	838.062	2318.36	0.430827	1.41752	6.14421	1.64866	740.092	267.033	382.811	13.1694	1478.68	1.83939	837.453	0.895431	0.242566	2097.24	0.152265	117.053	2.32365	2.44196	28.2929	3.88168
2011-06-11 13:45:00	2011-06-14 13:55:00	23.3132	0.0981032	0.554117	0.29068	5.69177	1.20932	1.83543	3.81526	0.291428	0.164536	0.325545	0.248698	730.408		16.1597	3.21744	354.922	1719.57	0.27156	0.854445	4.30103	0.970898	433.193	208.521	146.503	9.39855	1705.73	1.16796	435.58	0.0998973	0.198549	1271.37	0.110804	91.0185	0.2	0.900741	23.7037	2.90578
2011-06-14 14:30:00	2011-06-16 14:30:00	26.8763	0.398365	1.06217	0.0366588	4.15863	1.47197	2.22894	3.51517	0.360064	0.191559	0.320941	0.354752	747.729		6.62168	5.01164	587.403	3091.67	0.301522	0.954144	4.74153	2.23327	450.252	254.744	286.691	9.9621	2265.51	2.27183	1032.63	0.230609	0.134019	1202.24	0.0918384	87.6938	3.39516	2.3662	12.9935	3.56628
2011-06-16 14:50:00	2011-06-18 14:50:00	66.3174	0.41908	1.59463	0.0449812	7.28161	1.87653	2.68613	5.71813	0.267882	0.25109	0.504998	1.14908	2804.16	0.620008	34.7723	8.4294	2674	3944.77	1.0282	4.17628	3.34731	4.67763	2088.69	795.571	759.547	32.3652	3504.74	5.47905	1520.85	0.341932	0	5454.31	0.392594	259.401	5.83267	3.78867	37.8118	10.2654
2011-06-18 15:25:00	2011-06-21 15:25:00	20.7177	0.178081	1.27403	0.0960312	1.21597	0.363505	0.63643	1.22551	0.137618	0.0449077	0.102816	0.103338	857.743	0.119089	6.41555	4.2793	477.319	3145.98	0.347882	0.729208	0.295122	1.10876	370.881	184.036	454.393	6.10915	2431.43	1.08104	991.418	0.215359	0.118369	1278.04	0.0791916	55.468	0.18	1.6168	9.40064	3.31687
2011-06-24 08:05:00	2011-06-25 12:05:00	67.4213	1.17147	1.45895	0.0309451	8.9738	1.85962	3.52445	6.2249	0.257566	0.246525	0.532191	0.990474	3039.45	0.257059	21.0769	11.677	1788.01	6944.23	0.862135	3.39184	1.67096	5.13795	1631.15	866.556	858.129	22.9986	5508.29	4.61305	1637.65	0.509444	0.527562	5167	0.294608	202.54	5.1596	1.78556	35.7721	7.87746
2011-06-25 13:45:00	2011-06-27 13:45:00	65.4365	0.573455	0.919147	0.109963	5.34733	2.6101	3.49948	3.75217	0.31641	0.175929	0.335213	0.786506	3503.7	0.487437	36.3049	6.86251	1533.46	4190.19	0.920414	3.94377	2.74295	4.49481	1970.69	770.295	662.608	30.1657	3677.52	4.82187	1319.58	0	0.678535	6145.37	0.401989	235.02	8.13192	4.22316	22.7102	9.1789
2011-06-27 14:15:00	2011-06-29 14:21:00	47.6464	0.212164	0.963669	0.204577	5.62972	1.42871	2.34942	4.39643	0.240339	0.182112	0.411872	0.713263	2309.18	0.423752	16.7977	4.4225	1170.87	2862.88	0.734437	3.27554	1.59206	1.84006	1471.29	665.379	430.816	19.5384	2252.82	2.25953	931.603	0.170103	0.471695	4127.27	0.307612	171.287	0.35	3.24138	24.0717	6.86571
2011-06-29 14:45:00	2011-07-02 09:45:00	39.3497	0.201455	0.601116	0.0806297	6.40993	1.22044	2.74296	4.80251	0.253469	0.192958	0.409053	0.549704	1708.8	0.344226	32.1741	4.9192	1045.88	3144.37	0.686983	2.46332	2.24843	2.14423	1180.45	462.012	465.186	20.1034	2732.81	2.64161	863.176	0.189945	0.376424	3059.87	0.25414	155.069	0.3	1.76809	28.1901	7.39324
2011-07-04 14:15:00	2011-07-07 13:38:00	37.3984	0.34652	0.749514	0.167493	5.37308	1.03338	2.03707	4.457	0.308426	0.176226	0.393846	0.491791	1289.71		14.8439	6.17251	777.725	5078.38	0.222286	0.33	0.857386	2.9313	809.127	426.878	453.4	12.8494	3823.72	1.74046	983.943	0.0537619	0	2190.55	0.162884	121.196	0.694505	2.53552	12.4503	4.95915
2011-07-08 13:45:00	2011-07-11 13:45:00	31.1948	0.252826	0.782645	0.0837756	5.36675	1.01633	1.99998	4.31295	0.312265	0.214633	0.390267	0.350493	1177.64	0.199124	59.3491	6.00505	586.13	4583.22	0.420155	1.23438	1.13828	2.56903	703.639	410.138	451.758	12.6644	3490.06	1.37074	811.339	0.60712	0.196282	1978.99	0.145552	103.757	0.573362	1.89689	65.4609	4.51966
2011-07-11 14:30:00	2011-07-14 14:30:00	49.891	0.285761	0.765614	1.14689	5.46879	1.78579	2.88574	3.88493	0.277157	0.169073	0.38809	1.19181	1872.92	0.316634	25.685	6.01011	1969.3	3423.85	0.578744	2.67911	1.83409	2.0548	1243.35	639.055	482.843	18.9029	2933.29	2.31002	1015.4	0.162684	0.416343	3830.73	0.260791	127.838	2.50331	2.52938	13.9926	6.1192
2011-07-14 15:25:00	2011-07-17 15:25:00	58.9463	0.206229	1.03496	0.431141	6.92338	1.68283	2.97152	5.42048	0.338086	0.257962	0.516573	1.18359	2705.7	0.30421	25.6985	7.46231	1881.66	4787.91	0.888292	3.11774	2.51559	2.56532	1619.08	767.018	734.729	27.5641	4258.08	3.5481	1226.47	0.179699	0.524024	4969.59	0.363661	202.373	3.62723	2.78948	10.0536	7.19785
2011-07-17 16:15:00	2011-07-20 16:16:00	41.3531	0.197736	0.709017	0.0706026	5.70535	1.89289	2.23775	4.61402	0.307381	0.20677	0.439019	0.762417	1584.01		23.7017	4.93641	1051.37	4418.92	0.428527	2.04637	1.60515	2.19398	905.436	486.862	457.187	14.1015	3689.09	1.58366	980.777	0.224528	0	2898.64	0.213343	103.019	1.55313	2.23072	23.4332	5.39312
2011-07-20 17:00:00	2011-07-24 13:10:00	31.3879	0.139267	0.62403	0.102157	3.65772	0.943721	1.40803	2.97426	0.303673	0.140338	0.280705	0.38837	1300.93	0.111374	21.214	4.30727	579.429	3640.65	0.420991	1.42126	1.1526	1.46301	798.28	350.556	357.649	14.2068	2775.36	1.58484	650.25	0.122203	0.259146	2283.24	0.175745	103.369	1.30327	1.48246	10.0006	3.23613
2011-07-27 14:45:00	2011-07-30 14:45:00	28.5699	0.443768	0.928487	0.0676111	4.40465	1.21892	1.91543	3.87559	0.293487	0.174395	0.353159	0.314264	658.426	0.112494	3.78742	4.31008	446.028	3689.8	0.381783	1.16343	0.426078	1.80799	527.295	343.156	262.02	10.8409	3769.94	1.46172	654.928	0.153312	0	1085.43	0.12949	83.0566	0.2	1.16411	6.33532	3.63676
2011-07-30 17:05:00	2011-08-02 17:05:00	48.9221	0.541381	1.66943	0.521316	5.85339	1.77264	2.80868	5.38147	0.365061	0.249328	0.503396	0.777412	1587.03		21.0228	5.90628	970.588	3986.82	0.565167	2.64625	1.39475	6.70782	1062.14	556.101	441.833	16.3655	3911.41	2.8631	985.376	0.250114	0	2936.33	0.248077	127.819	6.43781	3.18209	32.2789	3.43648
2011-08-03 08:45:00	2011-08-07 08:55:00	44.5094	0.205568	0.730633	0.279851	5.76591	1.34679	2.08308	4.77114	0.25919	0.19481	0.452609	0.834962	1409.91		15.0056	8.12153	1257.64	6599.42	0.321933	1.30797	1.36175	1.55804	857.285	319.556	680.459	14.9977	2700	1.95969	965.102	0.276944	0	2705.76	0.134894	94.1032	2.30677	2.38392	30.002	3.62603
2011-08-09 14:02:00	2011-08-12 14:02:00	26.525	0.690176	0.727005	0.0717262	3.13771	1.04879	1.36562	2.39919	0.20098	0.118293	0.24461	0.431872	930.298	0.209998	8.70047	4.35526	614.436	2552.81	0.376763	1.91297	0.692762	3.05198	605.877	564.977	257.679	9.33154	4276.21	1.30104	560.51	0.277351	0	1716.72	0.167101	70.9558	1.52581	1.47704	20.3978	0
2011-08-12 14:35:00	2011-08-15 14:35:00	36.9379	0.172499	0.720924	0.069278	5.80556	1.37786	2.27431	4.73603	0.284526	0.189712	0.43806	0.452929	1035.8	0.248668	8.84018	4.96844	708.075	5050.14	0.347087	1.29886	0.858081	1.78479	632.752	382.27	452.913	10.2096	4219.96	1.28485	698.526	0.152852	0.209784	1831.66	0.129705	79.5913	1.10768	1.27831	14.2997	2.48963
2011-08-15 15:00:00	2011-08-18 15:00:00	40.5441	0.687836	1.10077	0.111976	3.99868	1.27979	1.87746	3.07689	0.268453	0.158014	0.315076	0.646925	1738.34		18.4948	5.38757	909.479	2621.77	0.490855	2.22597	1.76753	3.23834	1175.43	564.108	374.433	17.2978	2492.22	2.35905	673.804	0.21424	0.358208	3217.17	0.270014	133.512	4.66558	1.96813	17.7014	4.1718
2011-08-18 15:30:00	2011-08-21 15:30:00	39.1271	0.539756	0.815718	0.549916	5.54987	0.863379	1.95262	3.89457	0.147765	0.18218	0.373992	0.817176	1423.62		14.8262	12.9145	1223.16	4507.95	0.315701	1.76111	1.5326	3.04239	881.612	597.789	571.124	14.36	3563.57	1.86078	697.463	0.0703915	0.203336	2757.64	0.231606	91.1146	0.802402	1.34176	14.3937	2.98653
2011-08-22 09:35:00	2011-08-25 09:35:00	55.1763	0.296833	2.7899	1.17315	4.22841	0.60407	1.20458	3.01778	0.0896669	0.167847	0.257803	0.746279	2414.27	0.167083	22.6299	9.56247	1650.82	4630.83	0.701227	2.70441	1.56363	2.80636	1592.89	753.23	648.135	24.1586	3398.13	2.54457	727.729	0.0871003	0.422538	4815.89	0.293925	149.539	4.35119	1.28638	15	3.58679
2011-08-25 10:40:00	2011-08-28 10:40:00	26.8687	1.05945	2.66102	0.0394014	3.57762	0.36968	1.02562	2.57157	0.123908	0.128416	0.246976	0.311576	833.967	0.203332	6.56839	9.28354	663.317	3475.55	0.0807497	0.972943	0.24711	3.60213	473.677	246.236	296.045	7.56459	2083.58	1.92456	454.707	0.320273	0.117275	1422.41	0.0896955	62.3348	4.12069	1.18846	10.8722	2.40553
2011-08-28 14:55:00	2011-08-31 15:05:00	33.3744	0.252333	0.930614	0.0310126	5.50825	1.3593	2.11201	4.62962	0.267974	0.186204	0.436856	0.377497	950.669	0.165884	12.5283	4.73331	529.278	4929.79	0.327007	1.34664	0.469133	1.28432	565.821	506.074	371.036	8.66216	4775.05	1.68174	812.702	0.149835	0.192865	1715.58	0.124113	62.4178	4.42596	0.807371	19.1337	1.21562
2011-09-03 15:00:00	2011-09-07 15:00:00	34.7171	0.124811	1.07865	0.203083	6.62479	0.929956	1.72144	4.91932	0.26478	0.207079	0.495625	0.367013	462.119	2.54917	128.948	5.5242	526.427	4464.7	0.171376	0.065	0.0488121	0.528062	269.773	29	351.473	4.33793	4212.28	0.695932	585.325	0.15	0.0877028	1045.07	0.003	29.497	0.599772	0.780949	97.95	2.08445
2011-09-07 17:45:00	2011-09-10 17:45:00	32.0413	0.352914	0.80856	0.0994408	4.51146	1.46615	2.27131	4.04946	0.364806	0	0.403479	0.477292	882.567	3.6412	10.8542	4.61933	659.897	3810.72		0.075	0.592186	2.25012	616.845	24.5	345.307	10.1324	4336.28	1.70672	843.762	0.15	0.20672	1610.17	0.004	75.7945	3.33537	1.23203	13.5929	3.00824
2011-09-12 15:30:00	2011-09-15 15:33:00	34.6818	0.149717	0.637917	0.0271225	5.30807	1.47513	2.06308	4.36213	0.342443	0.191628	0.422959	0.503296	1057.22		20.7439	4.28899	671.534	4271.33	0.024	1.5	0.547263	0.995783	635.567	529.533	415.648	9.45306	4329.13	1.31773	839.347	0.09	0.215681	1941.23	0.236377	68.241	2.19188	1.14505	23.3349	3.69037
2011-09-15 16:30:00	2011-09-18 16:30:00	26.3551	0.118076	0.58162	0.0393903	4.01476	1.18477	1.54092	3.4628	0.279085	0.14516	0.339168	0.310513	737.718		13.3131	3.84055	433.355	3435.84	0.2523	0.08	0.191748	0.685164	447.12	376.259	241.749	6.50234	3347.66	0.998262	707.931	0.11	0.147676	1340.34	0.131441	52.3048	1.50394	1.08778	25.9301	2.65978
2011-09-18 17:10:00	2011-09-21 17:10:00	21.0199	0.135496	0.598421	0.02688	4.46062	0.661139	1.3926	3.40032	0.131631	0.138139	0.31636	0.279553	643.251		4.31035	4.46547	725.182	3186.69	0.076	0.09	0.763705	2.27556	395.41	15	207.592	4.93236	3.7	0.932063	702.654	0.15	0	1159.44	0.001	46.8109	2.34587	1.98408	18.9167	2.20738
2011-09-25 12:15:00	2011-09-28 12:15:00	28.1958	0.477225	1.15709	0.259707	1.73191	0.994634	1.03834	1.38553	0.186189	0.0957092	0.145006	0.491202	2150.84		0	4.19475	1074.48	1902.62	0.65	0.09	1.82595	1.93937	917.556	20	643.018	15.4289	5.7	2.46556	655.535	0.889527	0.231693	3551.84	0.13	101.869	0.25	1.30736	11.7192	3.23056
2011-09-28 13:00:00	2011-09-30 13:00:00	47.4423	0.393715	1.16625	0.716827	5.68136	1.64202	2.0049	4.47329	0.268482	0.212945	0.415602	0.922715	2032.34	0.533488	17.9987	8.18097	1754.34	5535.92	0.5942	0.08	1.68489	2.09968	1098.81	971.628	722.427	16.466	5375.4	2.26803	1118.94	0.232604	0.371903	3825.94	0.259849	106.274	2.08033	4.08945	18.8818	4.62353
2011-09-30 13:55:00	2011-10-02 13:55:00	47.4923	0.231167	0.907151	0.0773621	4.69834	2.11814	3.37548	3.79982	0.515338	0.222443	0.466284	1.16327	2392	0.559628	19.8843	5.79123	1623.68	3996.02	0.303019	0.075	1.81807	1.80406	1199.04	1023.44	781.345	18.9068	4700.55	2.91921	1583.01	0.291857	0.430702	4272.55	0.279611	114.804	7.18167	7.96043	13.874	4.37347
2011-10-02 16:00:00	2011-10-05 09:00:00	22.2575	0.34774	1.08687	0.0452351	1.72438	0.952615	1.34372	1.2613	0.23002	0.0663294	0.139626	0.315011	1408.69	0.205795	15.3723	4.25169	629.518	1462.25	0.353737	1.46476	0.651415	2.1691	682.673	338.215	353.863	11.2964	1285.9	1.25974	665.657	0.253617	0.218485	2275.44	0.163627	76.9848	1.93374	2.1076	18.2103	3.186
2011-10-06 15:20:00	2011-10-08 13:01:00	105.533	0.035196	2.4558	2.04076	4.58338	2.0291	2.81916	3.09916	0.238443	0.158207	0.317154	1.31571	8897.6		49.1279	10.661	4011.11	5193.27	1.59165	8.34439	5.96439	6.09932	3933.91	1617.41	2248.68	58.8211	4555.42	6.94412	1705.63	0.25382	1.19903	15493.6	0.720342	406.239	5.66263	9.37739	23.4557	16.8557
2011-10-08 13:35:00	2011-10-10 13:35:00	64.1724	0.356284	1.60943	0.33132	4.02937	1.63873	2.74536	3.02507	0.409671	0.149175	0.293214	0.680066	4806.57	0.938402	26.1872	7.31383	2224.89	4382.49	0.942785	4.25222	3.35927	4.51245	2087.18	952.077	1476.03	32.183	3750.43	5.16274	1767	0.322033	0.626838	7734.55	0.402053	231.711	6.41908	6.55325	43.7448	8.3928
2011-10-10 15:15:00	2011-10-12 15:15:00	81.2349	0.00665278	1.61957	1.57729	4.84809	2.54859	4.34809	4.24363	0.508748	0.28079	0.45375	1.93799	6466.43	0.721019	50.2207	2.84447	2366.3	2762.47	0.9	0.44	2.2701	4.1523	3099.08	1752.53	1183.93	52.7487	3589.47	4.39597	1176.22	0.15	1.03412	11155.8	0.677467	330.148	6.49804	3.33435	25.5323	12.0606
2011-10-12 16:20:00	2011-10-14 16:20:00	65.6444	0.176016	1.36955	1.81136	5.68136	1.26071	1.93633	4.36213	0.184756	0.19481	0.424316	0.697	5917.05	0.943412	27.2766	7.55792	2762.77	3834.28	0.76	0.44	3.6779	3.95805	2419.35	1547.88	1655.81	35.8544	4039.66	4.03291	1514.31	0.15	0	9738.63	0.13	237.082	3.59507	4.04879	17.7652	8.67141
2011-10-15 13:50:00	2011-10-17 13:50:00	64.2543	0.330468	1.20389	0.304361	5.66172	1.54712	3.426	4.13738	0.331315	0.210219	0.42545	1.02877	5543.99		28.7256	10.4119	1679.06	5349.64	0.930414	0.44	3.05057	2.22069	2190.21	1238.03	1363.56	33.0936	4189.76	3.22596	1658.25		0	9243.95	0.479729	217.273	0.43	4.44551	43.3598	6.95965
2011-10-17 14:35:00	2011-10-20 09:30:00	25.8814	0.221737	1.11461	0.653312	4.26345	1.68022	1.93633	3.1802	0.22634	0.17609	0.29927	0.568577	1685.02	0.212925	6.97629	11.4899	713.611	4800.24	0.32	0.44	0.639332	1.44689	906.336	478.821	438.841	15.9336	3445.8	1.54321	617.217	0.15	0.283612	3352.19	0.216118	94.8994	0.912209	1.76666	28.0641	4.94019
2011-10-20 15:30:00	2011-10-22 15:50:00	78.7123	0.231104	1.62758	1.2912	4.94327	2.27776	2.45746	3.35043	0.21543	0.221614	0.363919	1.42248	7091.72	0.916229	43.4846	8.20348	2704.95	4476.53	1.3238	0.44	4.38209	3.95361	2878.19	1700.12	1667.12	43.185	3576.03	4.58859	1355.32	0.134901	1.04157	12294	0.671561	277.166	5.69041	6.35107	39.9109	11.497
2011-10-22 16:40:00	2011-10-25 13:45:00	19.5115	0.12954	1.69211	0.13345	1.11806	0.132373	0.619619	0.740912	0.0222448	0.0316795	0.0551845	0.107584	1163.89	0.145749	12.6745	6.47664	382.444	1741.22	0.22	0.44	0.54402	1.45773	577.608	389.574	254.601	8.21482	1746.57	0.894327	342.179	0.06	0.193566	1950.92	0.125906	54.8618	1.70247	1.1148	6.46848	2.85955
2011-10-26 12:25:00	2011-10-29 12:48:00	19.0444	0.0943193	0.374564	0.526711	3.90012	0	1.04959	3.03891	0.128561	0.12119	0.272584	0.147909	1249.4	0.163723	5.75029	6.2687	394.236	5061.39	0.0778736	0.045	0.128726	1.05851	236.792	250.032	924.59	3.54974	3314.58	0.749894	444.8	0.05	0.0741627	1587.04	0.0534703	25.0728	1.69695	0.983923	17.9616	1.95293
2011-11-01 17:25:00	2011-11-05 08:40:00	30.1752	0.0639006	0.807173	0.0166392	5.10451	0.931431	1.52642	4.11123	0.184411	0.188432	0.381978	0.317927	1383.59	0.346111	9.81146	8.77647	323.636	3754.63	0.273752	1.37813	0.844859	1.18902	619.368	2	460.049	9.26349	88.9969	1.36504	799.694	0.102468	0.187151	2438.57	0.11	67.5438	0.827901	1.38578	32.2696	2.95064
2011-11-07 10:35:00	2011-11-10 14:35:00	33.7062	0.0535612	0.689099	0.217182	6.45221	1.03655	1.84309	4.86417	0.16772	0.186746	0.430627	0.566066	1790.69		11.5112	6.27026	930.482	4888.53	0.275672	1.43113	0.764529	1.88542	652.777	461.165	770.906	9.50974	4295.27	1.05556	773.812	0.130127	0.201739	2964.92	0.139853	63.4236	0.2	0.662931	13.9857	2.79226
2011-11-10 15:35:00	2011-11-13 15:35:00	17.2809	0.184253	0.780374	0.0383375	2.02279	0.708781	1.08266	1.64286	0.136849	0.0889607	0.151382	0.111696	800.341		0	5.95436	406.729	2580.94	0.30082	0.043	0.39014	1.68467	401.774	179.629	394.738	8.5034	2275.94	1.29881	603.714	0.15	0.092847	1227.79	0.0895256	62.4614	0.18	0.794995	16.5177	0
2011-11-13 16:55:00	2011-11-17 08:55:00	21.6072	0.0776544	0.675332	0.0899135	4.57622	0.785604	1.11958	3.58577	0.127782	0.139417	0.331573	0.183888	1285.15		7.15668	8.81316	260.241	6279.05	0.142804	0.032	0.282247	0.571179	311.69	106	1045.18	5.56197	3609.83	0.8615	336.973	0.15	0.0806388	1819	0.0676325	40.2961	0.381068	1.02682	29.5268	1.91664
2011-11-17 09:45:00	2011-11-20 09:45:00	22.3674	0.160319	0.614558	0.0249729	8.09802	1.74379	1.79389	5.16989	0.224579	0.235225	0.464708	0.362723	773.391		16.0748	11.1186	343.936	5834.71	0.181691	0.44	0.004	1.14069	261.901	119.047	586.122	4.97303	303.475	0.835556	624.541	0.15	0.0976266	1182.19	0.13	31.4185	0.909101	0.23	33.3761	1.1969
2011-11-20 12:45:00	2011-11-23 12:45:00	21.5125	0.064168	0.681264	0.0900247	7.10008	1.08345	1.70212	4.70234	0.132028	0.182824	0.416527	0.255432	546.459		3.90746	8.66298	293.582	4832.82	0.113961	0.44	0.004	0.569221	287.248	217.119	374.71	4.53502	3009.32	0.562409	571.945	0.059906	0.0664585	903.178	0.0443729	32.5737	1.15448	0.847192	24.892	1.37589
2011-11-23 13:40:00	2011-11-26 13:40:00	32.4363	0.0786359	0.74196	0.573876	7.50169	1.34987	1.76956	5.29578	0.0847823	0.197039	0.480695	0.706286	823.68		5.94751	8.03271	776.059	4115.05	0.215381	0.44	0.253293	0.987201	508.576	341.74	368.324	7.61476	3143.77	0.745851	475.336	0.05	0.147998	1558.3	0.112799	43.7664	0.16	1.05904	24.2605	1.57051
2011-11-26 16:17:00	2011-11-28 16:15:00	31.2712	0.0754052	0.730162	0.508902	5.21989	1.72922	1.57354	3.932	0.082699	0.174955	0.355358	0.637617	1367.73		15.7479	6.25582	883.495	4244.78	0.236647	0.44	0.929139	1.29383	785.385	374.445	467.659	12.523	2464.6	0.744051	528.969	0.0905009	0.17472	2409.23	0.136334	73.6348	1.86228	1.38	23.8197	3.2509
2011-11-28 17:16:00	2011-12-01 09:15:00	47.3674	0.0705299	1.03889	1.22254	5.90226	1.56044	1.92485	4.85928	0.0871245	0.214886	0.429709	1.14303	3030.24		21.7676	9.8009	1581.19	4135.51	0.421544	0.44	1.8323	2.14936	1488.07	586.256	907.897	22.5975	2228.88	1.93021	802.348	0.0550073	0	5179.33	0.234101	139.845	1.65469	3.62337	39.4151	5.15806
2011-12-01 09:40:00	2011-12-02 14:10:00	103.744	0.139463	1.52791	2.67662	6.35102	2.19383	2.75488	4.3247	0.0826967	0.307301	0.429895	1.85279	8436.58	0.414054	55.995	10.2363	3169.77	4666.81	1.04361	0.44	5.64356	6.6096	4285.83	1209.72	1826.97	69.451	2543.22	5.41526	1047.35	0.437863	0.80533	15379.4	0.609879	427.802	3.51605	7.00925	18.8681	19.8025
2011-12-02 14:25:00	2011-12-05 09:10:00	98.3963	0.000887732	1.53832	2.56441	7.93928	2.00993	3.01528	4.79813	0	0.236443	0.459445	1.60114	6126.14	0.420278	33.6611	15.2544	2824.52	5618.14	0.951552	0.44	3.66172	3.69799	3758.82	1005.95	1082.14	63.5135	2738.67	4.02579	1003.14	0.15	0	12289.6	0.13	366.481	0.75	4.95587	12.3407	14.1021
2011-12-05 15:20:00	2011-12-07 09:40:00	138.047	0.00538175	1.21744	8.03002	6.92228	2.08228	4.22134	5.33904	0.0569796	0.328854	0.646012	5.40642	6570.18	1.20392	53.2725	14.2303	5766.92	3431.87	1.91741	8.88314	6.48064	5.12109	5026.32	2432.88	1134.77	77.3361	4136.27	6.61813	1203.43	0.153583	1.58489	13462.6	0.889579	442.792	4.32933	10.0958	22.8604	18.0194
2011-12-10 11:10:00	2011-12-11 16:00:00	91.025	0.109941	1.38138	1.87275	4.97885	1.65358	2.73213	3.19075	0.0292539	0.232342	0.306897	1.49479	5895.99	0.84854	35.2	8.09177	2576.9	4676.98	1.45851	6.68403	4.20343	3.50526	3465.7	1467.59	993.284	54.0811	3055.38	3.74704	1127.75	0.16	1.0984	11182.7	0.678657	347.959	0.7	2.56428	11.5649	11.3688
2011-12-11 16:15:00	2011-12-12 13:45:00	228.055	0.00086855	2.31359	2.22425	7.65904	2.20655	2.96603	4.73514	0.000652468	0.317006	0.422333	1.89505	19285.5	1.1942	116.833	8.59392	3810.65	4427.57	3.51769	21.1781	14.0617	8.93564	10028.2	2473.1	2196.39	163.554	3459.12	10.5118	945.978		2.89068	33155.8	1.60768	1088.09	10.8463	11.1869	25.1748	38.369
2011-12-12 14:00:00	2011-12-13 09:15:00	317.72	0	2.5533	1.86126	5.68038	2.28602	2.35954	4.61649	0	0.353142	0.468294	1.75148	25086.6	1.7237	188.681	11.656	4529.21	5202.44	5.20532	34.2225	18.9134	12.4305	14455.8	4091.96	2803.15	226.082	4768.88	13.043	936.833		4.25448	44398.5	3.1228	1476.33	20.8722	14.1189	29.09	56.3466
2011-12-13 09:40:00	2011-12-14 09:40:00	381.735	0	4.01919	3.47387	5.85119	2.15487	2.52367	5.19012	0.00146215	0.79025	0.69005	3.93972	26564.4	1.97626	134.349	15.5807	6787.5	5794.35	6.12416	39.5047	18.4575	15.5091	16333.3	4610.22	2526.94	289.692	5410.27	15.6254	1022.15		4.72258	55675.5	3.98148	1847.82	2.4	16.0461	40.3705	82.6941
2011-12-14 10:00:00	2011-12-15 10:00:00	202.235	0	2.75999	3.09571	6.12066	1.20984	1.20984	4.72528	0.0972779	0.337091	0.516116	1.90339	17949.5	1.33484	100.604	17.9474	3988.52	6484.23	3.29878	16.736	9.66784	8.16516	8604.38	2839.11	2549.74	150.378	4646.78	6.86392	1022.38	0.248169	2.47052	32630.3	1.75428	923.634	5.72709	9.64372	21.4055	37.6567
2011-12-15 10:40:00	2011-12-17 09:02:00	87.8094	0.136525	1.45958	1.59771	3.83507	0.712823	0.712823	3.58998	0.100373	0.169543	0.293059	0.67813	6237.03	0.649926	51.6897	15.0808	2233.69	3307.57	1.52607	5.94518	4.30176	4.09556	3445.84	1484.61	1209.93	52.6103	3275.34	4.68192	860.817	0.152796	1.08479	11231.6	0.743608	349.595	5.82212	4.34986	19.0464	14.4281
2011-12-17 09:35:00	2011-12-18 11:00:00	169.912		2.97576	3.09044	6.32698	1.03072	1.03072	4.77467	0.0474966	0.313146	0.492954	1.76266	11136	1.1957	205.25	16.5762	2975.56	4426.73	3.02497	14.5535	14.1618	10.8871	6921.12	2924.41	1878.29	119.139	4256.91	11.1411	752.877	0.181551	2.32085	20309.7	1.54676	713.447	1.2	12.0681	19.5844	26.7128
2011-12-18 11:20:00	2011-12-20 11:20:00	65.7351	0.0422529	1.1182	1.37762	7.41958	1.34256	1.34256	5.57502	0.123949	0.224441	0.535583	1.1982	5109.55	0.478409	22.6295	15.4601	2238.25	6288.31	0.7801	3.30847	0.940502	4.23769	2081.02	1016.62	1702.58	31.5212	4730.52	2.02377	1202.7	0.118366	0.567735	8265.48	0.364022	198.768	0.65	3.57539	16.7393	5.84429
2011-12-20 11:40:00	2011-12-22 11:40:00	72.6137	0.182436	1.6023	1.39792	3.15846	0.796933	0.796933	2.2862	0.0435016	0.114592	0.23744	0.582846	7972.82	0.612384	0	11.9518	2207.73	5838.28	0.957846	4.98096	2.34268	3.38896	2845.44	1005.33	1950.67	47.3371	3491.36	3.35875	893.078	0.11609	0.757366	13201	0.517727	304.905	0.9	3.80076	20.3987	12.8639
2011-12-22 12:00:00	2011-12-23 07:27:00	354.635	-4.57509e-05	7.06092	6.5391	4.03705	0.501901	0.501901	4.64285	0.072838	0.25754	0.640091	3.38085	37845.3	2.24912	68.0722	17.1856	7138.01	6597.28	5.66872	30.2346	19.0901	19.4401	16114.7	5371.79	6376.54	287.652	5173.18	14.3934	1498.05		4.40876	63239	3.03666	1729.07		16.0568	43.1332	66.0263
2011-12-23 08:05:00	2011-12-23 18:05:00	338.715	0.221464	1.25307	6.18507	10.6975	2.22466	3.76134	7.8053	0	0.435923	0.80243	3.8198	43097.3	2.49779	0	23.2843	7694.8	10833.5	5.89936	27.7862	14.085	16.6791	16260.9	5991.68	8083.94	285.576	5610.52	14.1236	1795.46	0.256768	4.44985	67213.2	2.93176	1740.76		17.855	33.9621	43.2634
2011-12-24 11:00:00	2011-12-26 08:21:00	69.3361	0.0870672	1.40815	1.11602	6.22516	0.897515	1.46676	3.7126	0.110182	0.182091	0.341733	0.90215	5191.73		29.7708	17.5242	1634.5	6832.21	0.938141	4.33508	2.19692	2.67492	2484.81		1265.25	41.9365		2.18216	833.034	0.11	0	8779.07	0.13	241.799	0.5	3.72657	13.9913	4.4278
2011-12-26 10:30:00	2011-12-28 10:30:00	44.1393	0.101608	0.827686	0.510885	5.52586	1.2078	1.59823	4.82949	0.121574	0.19436	0.453256	0.798603	2763.17		25.8051	7.97853	1115.24	3323.64	0.475282	1.93019	1.82409	2.33421	1344.02		767.375	20.4002		1.54756	689.965	0.17166	0	4780.88	0.13	126.413	0.3	2.48142	12.4608	5.97135
2011-12-28 11:00:00	2011-12-30 09:45:00	109.724	0.0214228	1.54077	2.5468	7.01192	1.42	2.2086	6.75668	0.0650325	0.340855	0.692057	2.09508	9597.49		62.7881	22.7665	3203.17	8693.35	1.63045	7.71164	5.52673	4.73135	4227.96		2736.36	70.1316		4.96063	1100.42	0.203062	1.23274	15929.9	0.13	382.821	2	3.07335	14.8741	15.5474
2011-12-30 10:50:00	2011-12-31 10:02:00	206.432	0.0010876	2.60404	4.00369	8.33806	1.11585	1.11585	6.77804	0.0106247	0.38819	0.691987	2.76579	11553.3		99.7616	24.2336	4382.1	5493.99	3.29789	15.9979	10.805	8.99245	8416.55		1550.42	144.424		7.87534	1025.84	0.15	2.53106	21924.4	1.93047	805.15	1.8	8.85879	16.3717	20.3854
2011-12-31 10:30:00	2012-01-01 10:30:00	134.154	0	1.62027	3.68832	2.70335	0.215789	0.215789	2.73791	0.0282345	0.142498	0.265009	0.95797	10526		85.0414	24.3282	4074.62	7724.42	0.76	0.44	4.10506	5.15247	5393.99		2119.09	91.2288		5.09943	1186.36	0.07	0	18268.4	0.13	475.421	0.95	10.2039	11.8605	19.3246
2012-01-01 11:00:00	2012-01-02 11:00:00	141.948	0.00145361	1.35706	4.00152	6.63327	1.20257	2.22203	6.2247	0	0.373497	0.620324	2.67886	11188.1		80.9355	21.1954	4135.02	6223.48	2.29535	10.5696	5.3562	5.19043	6030.21		2593.14	99.6889		5.38733	1109.91	0.15	1.74307	19136.1	4.57578	515.524	1.35	6.56178	12.9127	18.8108
2012-01-02 12:00:00	2012-01-03 09:00:00	215.856	0	2.31728	5.60187	8.22139	1.65966	3.07805	6.95084	0	0.396697	0.767089	3.25346	23877.9	1.53253	125.226	24.8816	5860.27	6761.55	3.3883	11.769	9.62838	8.44873	9726.14	3324.14	4998.83	162.62	5511.16	9.19521	1461.56	0.15	2.59864	39354.4	1.80545	933.332	13.0943	11.6982	20.6961	32.5011
2012-01-03 09:30:00	2012-01-04 09:30:00	188.751	0.000635925	2.23972	2.90684	6.26243	1.85232	2.65071	4.55301	0	0.375252	0.546707	2.43574	12517.9	1.2066	123.177	18.17	3903.7	4955.16	3.01318	8.05835	9.00402	6.17993	8267.73	2581.43	2094.22	136	4013.98	7.68698	898.698	0.151624	2.32867	23570.5	1.48372	795.541	1.6	8.22411	17.5243	36.047
2012-01-04 10:00:00	2012-01-05 10:00:00	181.033	0	2.52646	1.71006	5.29898	1.87668	2.00101	8.82992	0.212204	0.381842	0.78821	1.25795	15481.1	1.12592	98.6641	14.8854	3105.44	4968.61	3.16066	13.8614	11.6767	7.45638	8068.25	2595.38	2604.73	135.098	3228.67	8.53537	769.212	0.210776	2.27862	27320.1	1.43161	859.825	2	10.0874	17.7872	37.545
2012-01-05 10:30:00	2012-01-06 15:30:00	193.288	0.134	0.855	0.3	6.27551	1.87667	2.35658	2.66532	0.425334	0.313612	0.49562	1.37291	19118.2	1.33802	124.521	17.0217	4057.84	5265.91	3.14417	13.6928	13.1319	9.35434	8719.44	2801.7	3914.27	146.672	4045.28	9.72054	872.171	0.15	2.39657	31661.3	1.64499	884.022	1.6	8.87943	17.6946	26.8082
2012-01-06 15:50:00	2012-01-07 16:47:00	149.776	0.134	0.855	0.3	7.36355	2.31427	2.75839	3.45508	0.112661	0.215726	0.497339	1.59984	15967.6		102.284	17.9454	4102.75	5717.09	2.25795		10.9978	5.28372	6545.34	2428.9	3793.75	106.504	4671.58	6.71119	1175.58	0.15	1.74557	26519.2	0.16	611.373	1.5	6.67045	16.3231	27.0158
2012-01-07 17:10:00	2012-01-08 13:34:00	157.735	0.134	0.855	0.3	5.60304	2.74039	3.58152	2.68171	0.14267	0.190184	0.508527	1.84213	14541	1.37806	86.9394	12.6038	4484.5	4506.07	2.76342		10.2023	7.90439	7452.59	2277.88	3068.69	119.311	2914.17	7.80721	1115.21	0.546857	2.13417	24314.5	1.05464	671.563	1.8	8.1052	19.1238	34.9774
