# Supplementary material for: Source apportionment of atmospheric aerosol in a marine dusty environment by ionic/composition mass balance (IMB)
Source: Copernicus journal article supplement (doi:10.5194/acp-18-13215-2018), 2018-09-13
Supplement: Supplementary file [file acp-18-13215-2018-supplement-title-page.pdf › acp-18-13215-2018-supplement-title-page.pdf]

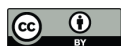

## *Supplement of*

# **Source apportionment of atmospheric aerosol in a marine dusty environment by ionic/composition mass balance (IMB)**

**João Cardoso et al.**

*Correspondence to:* Casimiro Pio ([casimiro@ua.pt](mailto:casimiro@ua.pt))

- [acp-18-13215-2018-supplement-title-page.pdf](#)
- [CVDUST dataset.xlsx](#)
- [acp-2018-10-supplement-version7.pdf](#)

The copyright of individual parts of the supplement might differ from the CC BY 4.0 License.
